# Supplementary material for: Mitochondria are physiologically maintained at close to 50 °C
Source: PubMed Central journal article supplement (PMC5784887; doi:10.1371/journal.pbio.2003992), 2018-01-25

A

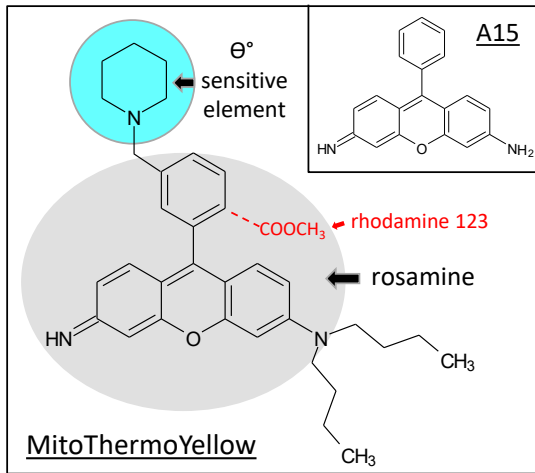

B

The mitochondrial respiratory chain concurrently generates ATP and heat

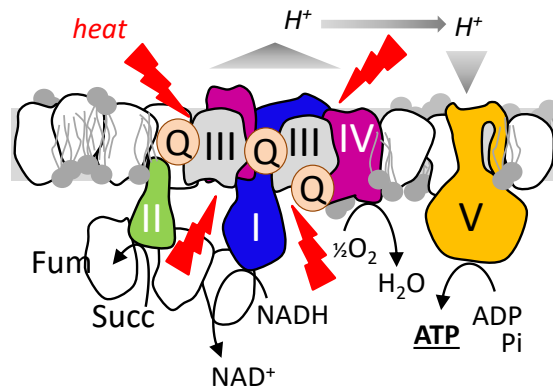

C

Treatment of cells by ethidium bromide impairs complexes possessing mtDNA-encoded subunits

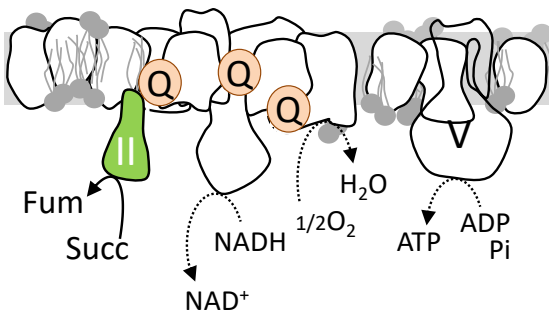

D

The different targets of the respiratory chain inhibitors

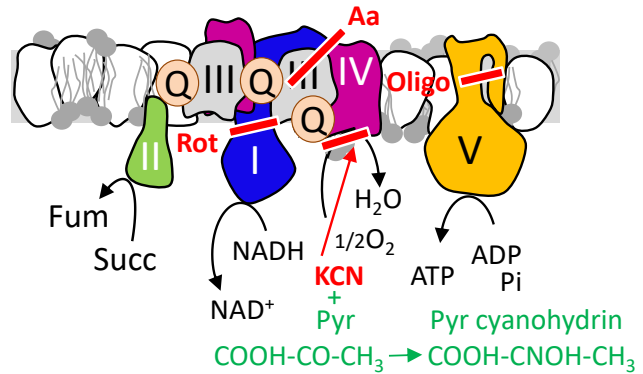

E

Overexpression of AOX results in propylgallate sensitive cyanide-resistant respiration

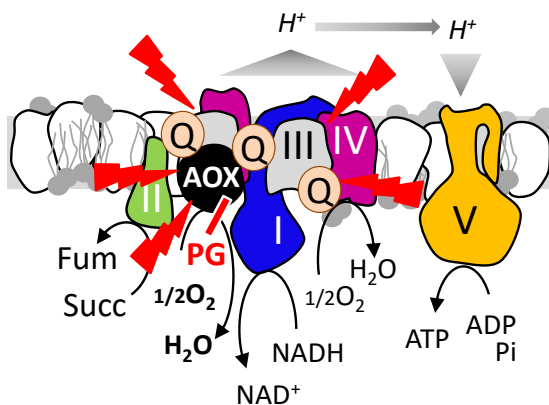

F

Overexpression of UCP1 results in oligomycin-resistant respiration

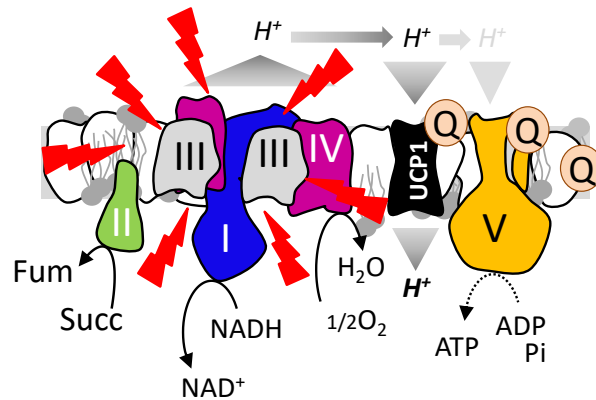

Supplement: pbio.2003992.s001.pdf [file pbio.2003992.s001.pdf]
