# Supplementary material for: Mitochondria are physiologically maintained at close to 50 °C
Source: PubMed Central journal article supplement (PMC5784887; doi:10.1371/journal.pbio.2003992), 2018-01-25

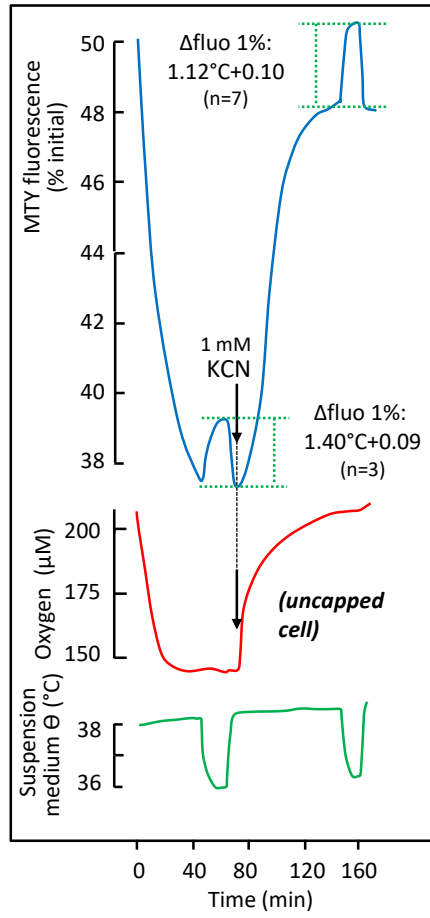

Supplement: pbio.2003992.s006.pdf [file pbio.2003992.s006.pdf]
